# Supplementary material for: Landscape evolution models using the stream power incision model show unrealistic behavior when m/n equals 0.5
Source: Copernicus journal article supplement (doi:10.5194/esurf-2017-15), 2017-03-20
Supplement: Supplementary file [file esurf-2017-15-AC1-supplement.pdf]

| Paper                    | Citation                                                                                                                                                                                                                                                                                                             |
|--------------------------|----------------------------------------------------------------------------------------------------------------------------------------------------------------------------------------------------------------------------------------------------------------------------------------------------------------------|
| Adams et al. 2017        | This paper details the LANDLAB v1.0 OverlandFlow component. "By default, $m_{sp}$ and $n_{sp}$ have set values of $m_{sp} = 0.5$ and $n_{sp} = 1.0$ that can be adjusted by the model user."                                                                                                                         |
| Braun and Willett, 2013  | Basis for the FastScape fluvial geomorphic model. The authors used $m/n = 0.5$ for their sample solution. However, the authors do explore the effect of the value $n$ from 1.0 to 4.0 on the computational time needed to solve their implicit scheme.                                                               |
| Egholm et al., 2013      | $m/n = 0.5$ ; however, there is unlikely to be scale invariance because their stream power incision model is more complex than the one we analyze. They employ a term that protects the bed from incision due to an alluvial cover.                                                                                  |
| Fox et al. 2014          | This paper presents an inversion method for backing out paleorock uplift rates in Taiwan. The analysis uses the ratio $m/n = 0.5$ .                                                                                                                                                                                  |
| Goren et al., 2014       | <i>Table 1</i> lists the default values where $m = 0.5$ and $n = 1.0$ . Also uses $h = 2.0$ , which means $hm/n = 1.0$ . This paper is the basis for the DAC model.                                                                                                                                                  |
| Harel et al., 2016       | $m/n = 0.51 \pm 0.14$ from a global analysis. This value is not statistically significant from 0.5.                                                                                                                                                                                                                  |
| Hobley et al., 2017      | This paper details LANDLAB. "This is primarily to maintain dimensionally sensible units for $K$ while still honoring the widely observed ratio of $m/n \sim 0.5$ , interpreted from channel concavities of natural rivers at apparent topographic steady state."                                                     |
| Passalacqua et al., 2006 | <i>Equation 2</i> shows a "special case of the general governing equation, widely used in landscape modeling [e.g. <i>Rodriguez-Iturbe and Rinaldo, 1997</i> ] with $m/n \approx 0.5$ ."                                                                                                                             |
| Pelletier, 2004          | Uses the value $m/n = 0.5$ to explore landscape evolution models with persistent drainage migration.                                                                                                                                                                                                                 |
| Willet et al., 2014      | In their <b>Response of <math>\chi</math> to a Change in Drainage Area</b> section, they "assume that $h = 2$ and $m/n = 0.5$ ." The sample simulations using the DAC model uses $m = 0.5$ and $n = 1.0$ . They also fit various values of $m/n$ when regressing $\chi$ vs. elevation plots in real drainage basins. |
| Whipple and Tucker, 1999 | "For typical values of the exponent..." in empirical relations they cite in their paper, "...the $m/n$ ratio is predicted to fall into a narrow range near 0.5." This paper is widely cited when choosing an appropriate value of $m/n$ . They state the range is between 0.3 and 0.6, near 0.5.                     |
| Whipple et al. 2017      | In this recent paper, the authors investigate whether low-relief, high-elevation surfaces are formed by preservation of relic landscapes or stream piracy, applied to the Tibetan Plateau. Their sample simulations are conducted with the stream power incision model with $m/n = 0.5$                              |
| Whipple et al. 2017      | This paper compares response timescales for divide migration and drainage capture. In all cases of their analysis, $m/n = 0.5$ .                                                                                                                                                                                     |
| Yang et al. 2015         | Their DAC 2D simulations used $n = 1$ and $m = 0.5$ , but they used different values of $m/n$ for their $\chi$ profiles. They test a variety of $m/n$ values, but end up using $m/n = 0.45$ . This paper also investigates the morphology of the Tibetan Plateau as does Whipple et al. 2017.                        |

- Adams, J. M., Gasparini, N. M., Hobbey, D. E. J., Tucker, G. E., Hutton, E. W. H., Nudurupati, S. S. and Istanbulluoglu, E.: The Landlab v1.0 OverlandFlow component: a Python tool for computing shallow-water flow across watersheds, *Geoscientific Model Development*, 10(4), 1645–1663, doi:10.5194/gmd-10-1645-2017, 2017.
- Braun, J. and Willett, S. D.: A very efficient  $O(n)$ , implicit and parallel method to solve the stream power equation governing fluvial incision and landscape evolution, *Geomorphology*, 180–181, 170–179, doi:10.1016/j.geomorph.2012.10.008, 2013.
- Egholm, D. L., Knudsen, M. F. and Sandiford, M.: Lifespan of mountain ranges scaled by feedbacks between landsliding and erosion by rivers, *Nature*, 498(7455), 475–478, doi:10.1038/nature12218, 2013.
- Fox, M., Goren, L., May, D. A. and Willett, S. D.: Inversion of fluvial channels for paleorock uplift rates in Taiwan, *Journal of Geophysical Research: Earth Surface*, 119(9), 1853–1875, doi:10.1002/2014JF003196, 2014.
- Goren, L., Willett, S. D., Herman, F. and Braun, J.: Coupled numerical-analytical approach to landscape evolution modeling, *Earth Surface Processes and Landforms*, 39(4), 522–545, doi:10.1002/esp.3514, 2014a.
- Harel, M.-A., Mudd, S. M. and Attal, M.: Global analysis of the stream power law parameters based on worldwide 10 Be denudation rates, *Geomorphology*, 268, 184–196, doi:10.1016/j.geomorph.2016.05.035, 2016.
- Hobbey, D. E. J., Adams, J. M., Nudurupati, S. S., Hutton, E. W. H., Gasparini, N. M., Istanbulluoglu, E. and Tucker, G. E.: Creative computing with Landlab: an open-source toolkit for building, coupling, and exploring two-dimensional numerical models of Earth-surface dynamics, *Earth Surface Dynamics*, 5(1), 21–46, doi:10.5194/esurf-5-21-2017, 2017.
- Passalacqua, P., Porté-Agel, F., Fofoula-Georgiou, E. and Paola, C.: Application of dynamic subgrid-scale concepts from large-eddy simulation to modeling landscape evolution, *Water Resources Research*, 42(6), n/a-n/a, doi:10.1029/2006WR004879, 2006.
- Pelletier, J. D.: Persistent drainage migration in a numerical landscape evolution model, *Geophysical Research Letters*, 31(20), doi:10.1029/2004GL020802, 2004.
- Rodríguez-Iturbe, I. and Rinaldo, A.: *Fractal River Basins: Chance and Self-Organization*, Cambridge University Press, Cambridge., 1997.
- Willett, S. D., McCoy, S. W., Perron, J. T., Goren, L. and Chen, C.-Y.: Dynamic Reorganization of River Basins, *Science*, 343(6175), 1248765–1248765, doi:10.1126/science.1248765, 2014.
- Whipple, K. X. and Tucker, G. E.: Dynamics of the stream-power river incision model: Implications for height limits of mountain ranges, landscape response timescales, and research needs, *Journal of Geophysical Research: Solid Earth*, 104(B8), 17661–17674, doi:10.1029/1999JB900120, 1999.
- Whipple, K. X., DiBiase, R. A., Ouimet, W. B. and Forte, A. M.: Preservation or piracy: Diagnosing low-relief, high-elevation surface formation mechanisms, *Geology*, 45(1), 91–94, doi:10.1130/G38490.1, 2017a.
- Whipple, K. X., Forte, A. M., DiBiase, R. A., Gasparini, N. M. and Ouimet, W. B.: Timescales of landscape response to divide migration and drainage capture: Implications for the role of divide mobility in landscape evolution: Landscape Response to Divide Mobility, *Journal of Geophysical Research: Earth Surface*, 122(1), 248–273, doi:10.1002/2016JF003973, 2017b.
- Yang, R., Willett, S. D. and Goren, L.: In situ low-relief landscape formation as a result of river network disruption, *Nature*, 520(7548), 526–529, doi:10.1038/nature14354, 2015.
